# Supplementary material for: A route to engineered high aspect-ratio silicon nanostructures through regenerative secondary mask lithography
Source: Royal Society of Chemistry journal article supplement (doi:10.1039/d1nr07024j), 2022-01-01
Supplement: d1nr07024j1.pdf [file d1nr07024j1.pdf]

# Supporting Information

## A route to engineered high aspect-ratio silicon nanostructures through regenerative secondary mask lithography

*Martyna Michalska,†<sup>a</sup> Sophia K. Laney,†<sup>a</sup> Tao Li,†<sup>a</sup> Manish K. Tiwari,<sup>b,c</sup> Ivan P. Parkin<sup>d</sup> and Ioannis Papakonstantinou\*<sup>a</sup>*

---

<sup>a</sup> *Photonic Innovations Lab, Department of Electronic & Electrical Engineering, University College London, Torrington Place, London WC1E 7JE, UK. i.papakonstantinou@ucl.ac.uk*

<sup>b</sup> *Nanoengineered Systems Laboratory, Department of Mechanical Engineering, University College London, Torrington Place, London WC1E 7JE, UK.*

<sup>c</sup> *Wellcome/EPSRC Centre for Interventional and Surgical Sciences (WEISS), University College London, London, W1W 7TS, UK.*

<sup>d</sup> *Department of Chemistry, University College London, Torrington Place, London WC1E 7JE, UK.*

† These authors contributed equally to this work.

## Supporting Figures

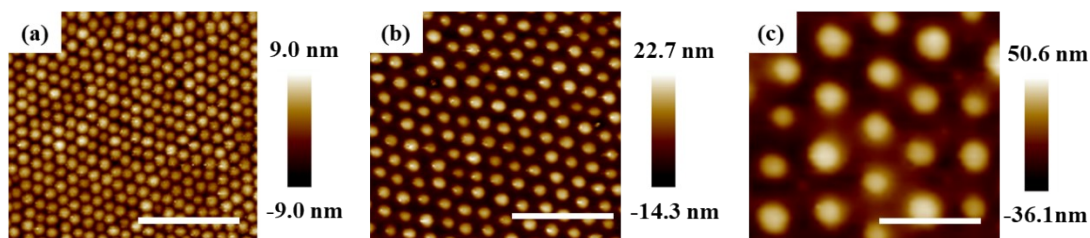

**Figure S1.** AFM images of hexagonally packed PS-*b*-P2VP micellar bumps generated from direct spin coating onto Si/SiO<sub>2</sub>. The molecular weight  $M_w$  dictates the pitch  $p$  of the micelles and varies across (a-c) with  $M_w / \text{kg mol}^{-1} = 57\text{-}b\text{-}57$ ,  $109\text{-}b\text{-}90$ , and  $440\text{-}b\text{-}353$ , giving rise to  $p = 56$ ,  $95$ , and  $257$  nm, respectively. Scale bars = 500 nm.

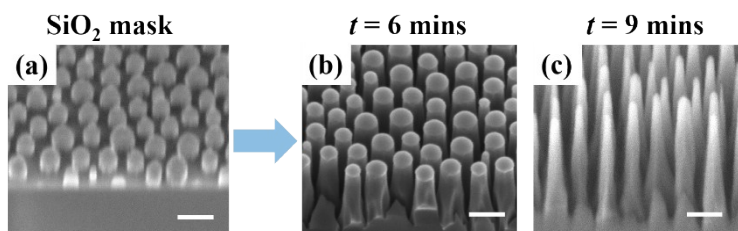

**Figure S2.** SEM images of the structures generated from a hard mask with  $d = 112$  nm. (a) SEM image of the hard mask, which under coil power 300 W and platen power 40 W yields straight walled nanopillars (b) with mask remaining after 6 min. Etching for a further 3 min under the same condition yields slender high AR nanopillars. Scale bars = 200 nm.

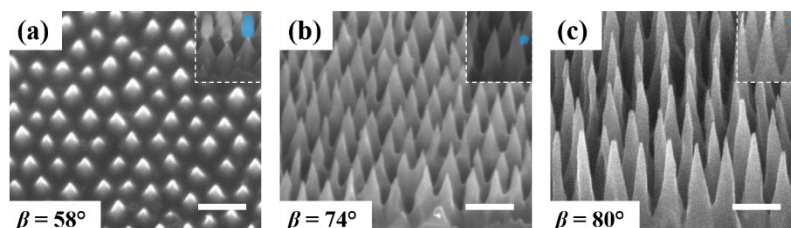

**Figure S3.** SEM images of sharp nanocones with varying slope angles after HF treatment (inset = before HF treatment, with remaining SiO<sub>2</sub> hard mask highlighted in blue). (a) Nanocones with  $\beta = 58^\circ$ , generated from a hard mask of  $h = 70$  nm under mixed plasma of Cl<sub>2</sub> (18 sccm) and SF<sub>6</sub> (2 sccm) at coil power 300 W, and platen power 10 W for 3 min. (b) Nanocones with  $\beta = 74^\circ$ , generated from a hard mask of  $h = 40$  nm under Cl<sub>2</sub> plasma (20 sccm) at coil power 200 W, and platen power 10 W for 25 min, followed by 1 min etching under mixed plasma: Cl<sub>2</sub> (19 sccm) and SF<sub>6</sub> (1 sccm). (c) Nanocones with  $\beta = 80^\circ$ , generated from a hard mask of  $h = 100$  nm under Cl<sub>2</sub> plasma (20 sccm) at coil power 200 W, and platen power 15 W for 15 min. Scale bars = 200 nm.

## **Supporting Videos**

**Supporting Video 1** – Slow-motion video of a bouncing droplet upon impacting the nanostructured 6-inch silicon wafer. The video was recorded using a high-speed camera. A water droplet of 8 $\mu$ L was deposited from a height of 1 cm, giving rise to 19 bounces.

**Supporting Video 2** – Self-cleaning effect of the superhydrophobic and antireflective 6-inch silicon wafer. The self-cleaning effect enables efficient removal of black pepper powder by a stream of water.
